# Supplementary material for: Study on Quality Control of Compound Anoectochilus roxburghii (Wall.) Lindl. by Liquid Chromatography–Tandem Mass Spectrometry
Source: MDPI journal article supplement (doi:10.3390/molecules27134130), 2022-06-27
Supplement: s1 [file s1]

### **Tables Caption**

**Table S1.** Recoveries of eight analytes in CAROL

**Table S2.** Recoveries of the extract of nucleosides

**Table S3.** Recoveries of the extract of ganoderic acid

**Table S1.** Recoveries of eight analytes in CAROL

| Analytes               | Original (µg) | Spiked (µg) | Detected (µg) | Recovery (%) | Mean recovery (%) | RSD % (n=6) |
|------------------------|---------------|-------------|---------------|--------------|-------------------|-------------|
| Adenine                | 1.21          | 0.90        | 2.04          | 91.73        | 92.41             | 1.31        |
|                        | 1.12          | 1.50        | 2.53          | 93.69        |                   |             |
|                        | 1.07          | 2.10        | 2.99          | 91.79        |                   |             |
| Uridine                | 7.72          | 5.00        | 12.26         | 90.94        | 90.05             | 2.49        |
|                        | 7.33          | 8.40        | 14.78         | 88.69        |                   |             |
|                        | 7.44          | 10.10       | 16.58         | 90.53        |                   |             |
| 2'-Deoxyuridine        | 0.09          | 0.05        | 0.13          | 95.32        | 92.36             | 2.93        |
|                        | 0.09          | 0.08        | 0.16          | 90.37        |                   |             |
|                        | 0.08          | 0.11        | 0.18          | 91.40        |                   |             |
| 2'-Deoxyadeno-<br>sine | 0.0111        | 0.0060      | 0.0168        | 94.83        | 96.86             | 3.08        |
|                        | 0.0117        | 0.0100      | 0.0214        | 96.63        |                   |             |
|                        | 0.0102        | 0.0140      | 0.0241        | 99.13        |                   |             |
| Guanosine              | 6.57          | 4.20        | 10.50         | 93.57        | 90.09             | 3.31        |
|                        | 6.61          | 7.00        | 12.84         | 89.00        |                   |             |
|                        | 6.30          | 9.80        | 14.89         | 87.71        |                   |             |
| Lucidenic acid A       | 2.10          | 1.38        | 3.32          | 88.03        | 85.07             | 3.04        |
|                        | 2.00          | 2.30        | 3.92          | 83.14        |                   |             |
|                        | 1.77          | 3.22        | 4.48          | 84.03        |                   |             |
| Ganoderic acid F       | 19.29         | 13.80       | 33.11         | 100.16       | 97.50             | 2.41        |
|                        | 18.67         | 23.00       | 40.72         | 95.90        |                   |             |
|                        | 18.13         | 32.20       | 49.19         | 96.46        |                   |             |
| Ganoderic acid A       | 39.14         | 21.00       | 57.41         | 86.96        | 86.42             | 1.72        |
|                        | 36.79         | 35.00       | 67.48         | 87.66        |                   |             |
|                        | 34.36         | 49.00       | 75.83         | 84.63        |                   |             |

**Table S2.** Recoveries of the extract of nucleosides

| Analytes          | <i>A. roxburghii</i> form Mingxi |             |               |                   |             | <i>G. lucidum</i> form Longyang |             |               |                   |             |
|-------------------|----------------------------------|-------------|---------------|-------------------|-------------|---------------------------------|-------------|---------------|-------------------|-------------|
|                   | Original (μg)                    | Spiked (μg) | Detected (μg) | Mean recovery (%) | RSD % (n=3) | Original (μg)                   | Spiked (μg) | Detected (μg) | Mean recovery (%) | RSD % (n=3) |
| Adenine           | 0.01                             | 0.25        | 0.23          | 89.37             | 0.30        | 0.09                            | 0.25        | 0.30          | 84.25             | 0.97        |
| Uridine           | 6.42                             | 10.00       | 14.68         | 82.65             | 0.52        | 3.67                            | 5.00        | 8.61          | 90.38             | 1.00        |
| 2'-Deoxyuridine   | 0.07                             | 0.05        | 0.12          | 86.08             | 0.74        | 0.02                            | 0.05        | 0.06          | 84.49             | 0.93        |
| 2'-Deoxyadenosine | 0.92                             | 1.00        | 1.90          | 97.61             | 1.10        | 0.02                            | 0.05        | 0.07          | 94.27             | 0.77        |
| Guanosine         | 2.31                             | 2.50        | 4.40          | 83.77             | 0.78        | 1.68                            | 2.50        | 3.66          | 84.21             | 0.31        |

**Table S3.** Recoveries of the extract of ganoderic acid

| Analytes         | water extract of <i>G. lucidum</i> |             |               |                   |             | ethanol extract of <i>G. lucidum</i> |             |               |                   |             |
|------------------|------------------------------------|-------------|---------------|-------------------|-------------|--------------------------------------|-------------|---------------|-------------------|-------------|
|                  | Original (μg)                      | Spiked (μg) | Detected (μg) | Mean recovery (%) | RSD % (n=3) | Original (μg)                        | Spiked (μg) | Detected (μg) | Mean recovery (%) | RSD % (n=3) |
| Lucidenic acid A | 1.30                               | 3.20        | 3.92          | 81.86             | 0.73        | 1.29                                 | 3.20        | 4.01          | 85.06             | 0.36        |
| Ganoderic acid F | 8.54                               | 9.60        | 16.75         | 85.54             | 0.22        | 8.15                                 | 9.60        | 16.21         | 84.02             | 0.78        |
| Ganoderic acid A | 26.22                              | 16.00       | 40.47         | 89.08             | 0.90        | 26.95                                | 16.00       | 40.56         | 85.08             | 0.48        |
